# Supplementary material
Source: publisher figshare collection journal article supplement (https://karger.figshare.com/ndownloader/files/17220191)

## SUPPLEMENTARY MATERIAL 1

Figure

Legend: Cluster distribution and membership of all single call types (N = 252) illustrated by means of the first two PC scores. Different colours = different clusters; average Euclidean distance between all cluster centres: 0.78

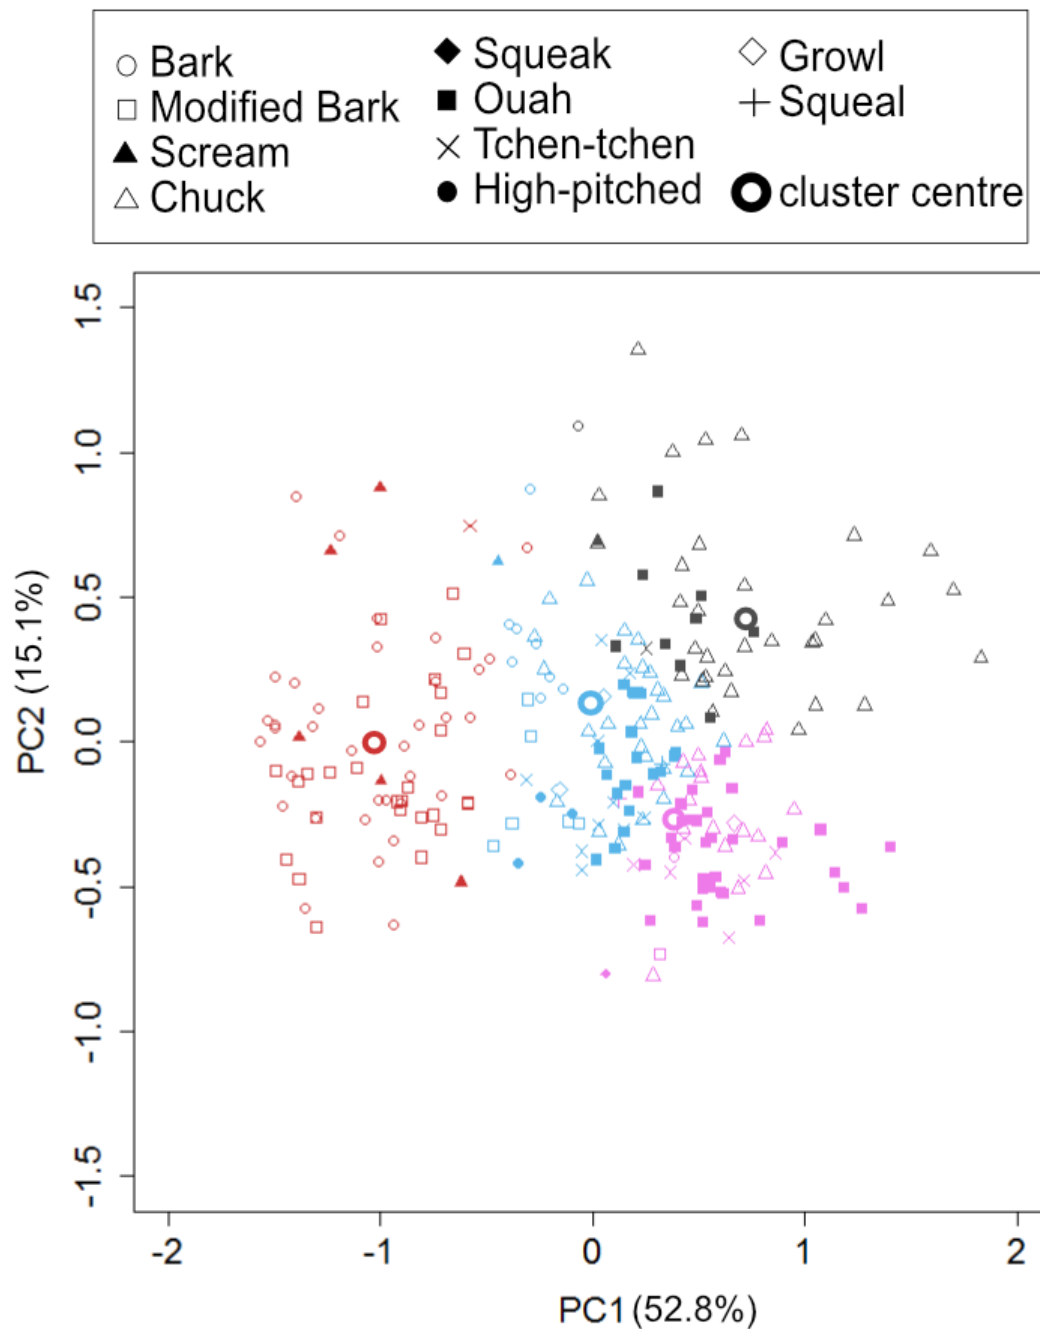

Supplement: Supplementary file 1 [file 17220191]
